# Supplementary material for: Selective adenosine A2A receptor inhibitor SCH58261 reduces oligodendrocyte loss upon brain injury in young rats
Source: PubMed Central journal article supplement — Saudi J Biol Sci. 2020 Oct 15;28(1):310–6. doi: 10.1016/j.sjbs.2020.09.063 (PMC7783643; doi:10.1016/j.sjbs.2020.09.063), 2020-10-15
Supplement: mmc1.pdf [file mmc1.pdf]

## CERTIFICATE OF EDITING

This is to certify that the paper titled **Inhibition of the adenosine A2A receptor upon injury protects against loss of oligodendrocytes in rats** commissioned to us by **Aziz Alsuqih** has been edited for English language, grammar, punctuation, and spelling by Enago, the editing brand of Crimson Interactive Inc. under Copyediting.

✓ **ISO 17100:2015**  
Translation Service  
Providers

✓ **ISO 27001:2013**  
Information Security  
Management System

✓ **ISO 9001:2015**  
Quality Management  
System

Issued by:  
  
Enago, Crimson Interactive Inc.  
160, Greentree Dr, Ste 101 street,  
Dover City, Kent, Delaware, 19904  
Phone: +1-302-498-8358

**Disclaimer**: The author is free to accept or reject our changes in the document after our editing. However, we do not bear responsibility for revisions made to the document after our edit on **25 Jul 2020**.

**Japan** www.enago.jp, www.ulatus.jp, www.voxtab.jp  
**Taiwan** www.enago.tw, www.ulatus.tw  
**China** www.enago.cn, www.ulatus.cn  
**Brazil** www.enago.com.br, www.ulatus.com.br  
**Germany** www.enago.de

**Russia** www.enago.ru  
**Arabic** www.enago.ae  
**Turkey** www.enago.com.tr  
**S. Korea** www.enago.co.kr  
**Global** www.enago.com, www.ulatus.com, www.voxtab.com

### **About Crimson:**

Crimson Interactive INC is one of the world's leading academic research support services. Since 2005, we've supported over 2 million researchers in 125 countries with their publication goals.
